# Supplementary material for: Fieldable flow injection analysis system with 1,1′-oxalyldiimidazolechemiluminescence detection capable of quantifying acetylcholine
Source: Royal Society of Chemistry journal article supplement (doi:10.1039/c0ay00440e), 2010-12-01
Supplement: c0ay00440e.pdf [file c0ay00440e.pdf]

Supplementary Material (ESI) for Analytical Methods

This journal is (C) The Royal Society of Chemistry 2011

## **Fieldable flow injection analysis system with 1,1'-oxalyldiimidazole chemiluminescence detection capable of quantifying acetylcholine**

(Electronic Supplementary Information)

Hui Rak J. Kang <sup>a,b</sup>, Kam Chan Kang <sup>b,c</sup>, John G. Newby <sup>d</sup>, Ji Hoon Lee <sup>b,\*</sup>

<sup>a</sup> Newton North High School, Newtonville, MA 02460, USA.

<sup>b</sup> Luminescent MD, LLC, Hagerstown, MD 21742, USA. Fax: 1-301-193-9092; Tel: 1-301-393-9091; E-mail: [jhlee@luminescentmd.com](mailto:jhlee@luminescentmd.com)

<sup>c</sup> Brookline High School, 115 Greenough St. Brookline, MA, 02445, USA.

<sup>d</sup> Department of Pathology, Washington County Hospital, Hagerstown, MD, 21740, USA

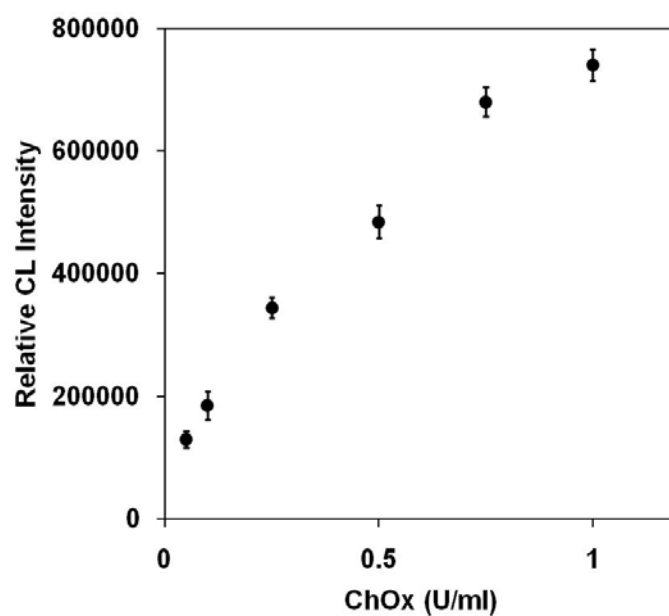

**Fig. S-1** Effect of ChOx. Condition: [ACh] = 3.0  $\mu$ M, [AChE] = 1.0 U/ml, [HRP] = 1.0 U/ml, [Amplex Red] = 1.25  $\mu$ M, [TCPO] = 15.0  $\mu$ M, [4MI<sub>m</sub>H] = 75.0  $\mu$ M, [H<sub>2</sub>O<sub>2</sub>] = 0.1 M, Incubation time: 20 minutes

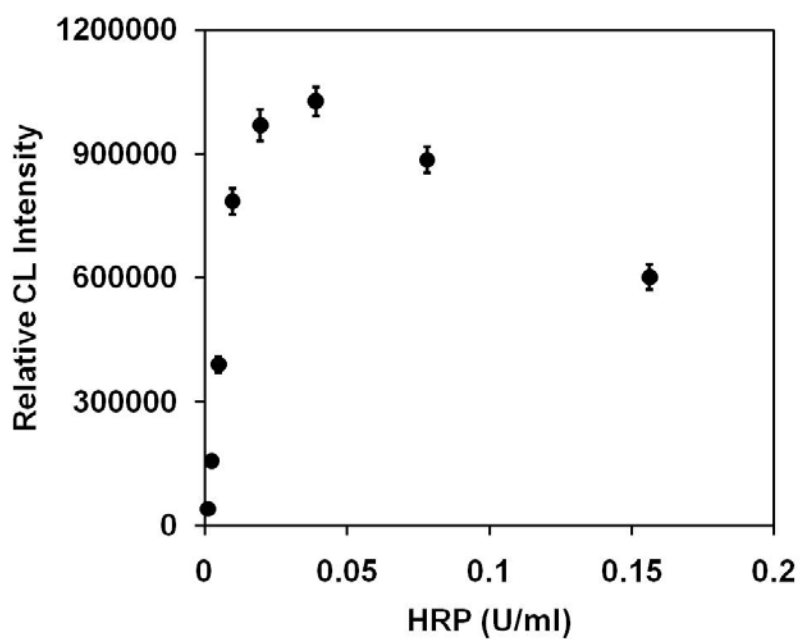

**Fig. S-2** Effect of HRP. Condition: [ACh] = 3.0  $\mu$ M, [AChE] = 1.0 U/ml, [ChOx] = 0.5 U/ml, [Amplex Red] = 1.25  $\mu$ M, [TCPO] = 15.0  $\mu$ M, [4MI<sub>m</sub>H] = 75.0  $\mu$ M, [H<sub>2</sub>O<sub>2</sub>] = 0.1 M, Incubation time: 20 minutes

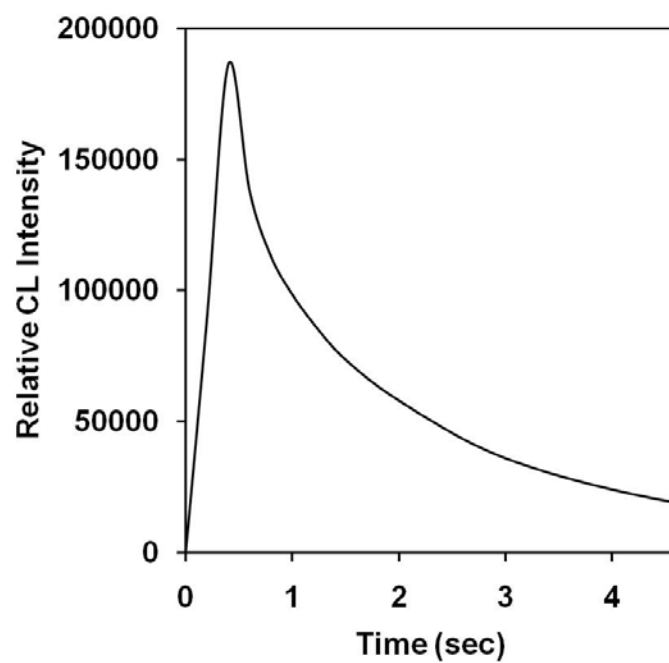

**Fig. S-3** CL emission of resorufin

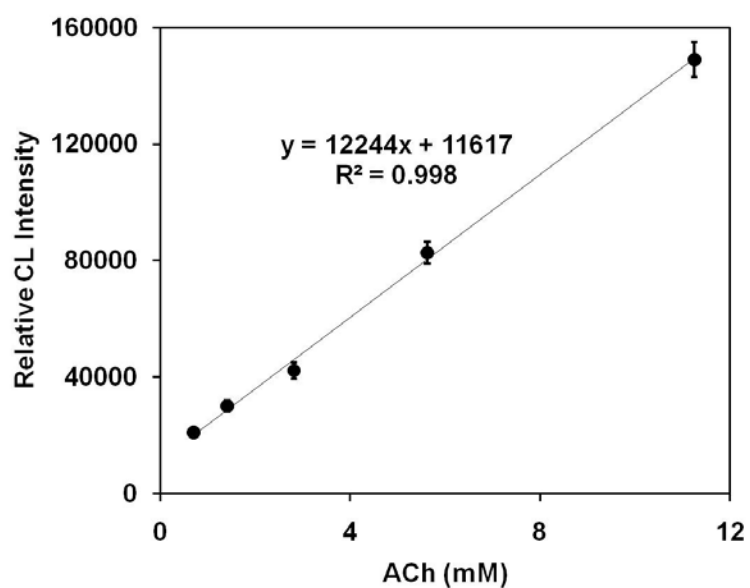

**Fig. S-4** Linear calibration curve for the quantification of ACh using FIA system with ODI CL detection. Condition: [AChE] = 1.0 U/ml, [ChOx] = 0.5 U/ml [HRP] = 0.04 U/ml, [Amplex Red] = 1.00  $\mu$ M, [TCPO] = 10.0  $\mu$ M, [4MI<sub>m</sub>H] = 50.0  $\mu$ M, [H<sub>2</sub>O<sub>2</sub>] = 0.1 M, Incubation time: 15 minutes
